# Supplementary material for: Diversity Patterns and Assemblage Structure of Non-Biting Midges (Diptera: Chironomidae) in Urban Waterbodies
Source: MDPI journal article supplement (doi:10.3390/d14030187), 2022-03-04
Supplement: s1 [file s1]

**Supplementary Materials:** Table S1: Sampling sites and their characteristics; Table S2: Detected pressures at sampling sites and water quality classes according to the Water Pollution Index (WPI) value; Table S3: Taxa list and frequencies of species in four clusters of species assemblages.

**Table S1.** Sampling sites and their characteristics.

| Sites                        | Coordinates                | Alt | WBT                | FV | Bottom substrate      | Bm                        | Av     |
|------------------------------|----------------------------|-----|--------------------|----|-----------------------|---------------------------|--------|
| <b>1. Savsko jezero</b>      | N 44.786617<br>E 20.397291 | 70  | Reservoir          | -  | Coarse                | Embankment                | low    |
| <b>2. Bela reka</b>          | N 44.653785<br>E 20.460893 | 202 | Reservoir          | -  | Large, cohesive       | Embankment                | low    |
| <b>3. Duboki potok</b>       | N 44.585256<br>E 20.436488 | 157 | Reservoir          | -  | Coarse, fine          | Embankment                | low    |
| <b>4. Pariguz</b>            | N 44.706749<br>E 20.461182 | 131 | Reservoir          | -  | Coarse, cohesive      | Embankment                | medium |
| <b>5. Galovica</b>           | N 44.769287<br>E 20.344667 | 70  | Canal              | -  | Cohesive, organic     | Riprap, Concrete wall     | medium |
| <b>6. Kalovita</b>           | N 44.854172<br>E 20.556216 | 70  | Canal              | -  | Cohesive, organic     | Embankment                | high   |
| <b>7. Karaš</b>              | N 45.083448<br>E 20.353356 | 74  | Canal              | -  | Concrete              | Concrete wall             | low    |
| <b>8. Obrenovački kanal</b>  | N 44.657590<br>E 20.223684 | 70  | Canal              | -  | Cohesive, organic     | Embankment                | low    |
| <b>9. PKB</b>                | N 44.921915<br>E 20.361457 | 71  | Canal              | -  | Cohesive, organic     | Riprap                    | High   |
| <b>10. Progarska Jarčina</b> | N 44.719060<br>E 20.148082 | 71  | Canal              | -  | Cohesive, organic     | Riprap                    | high   |
| <b>11. Vizelj</b>            | N 44.853984<br>E 20.446842 | 69  | Canal              | -  | Cohesive, organic     | Embankment                | medium |
| <b>12. Sibnica</b>           | N 44.867080<br>E 20.592297 | 72  | Canal              | -  | Cohesive, organic     | Embankment                | medium |
| <b>13. Danube</b>            | N 44.769114<br>E 20.619469 | 66  | Non-wadeable river | +  | Fine, cohesive        | Embankment                | low    |
| <b>14. Sava</b>              | N 44.772317<br>E 20.359821 | 71  | Non-wadeable river | +  | Fine, cohesive        | Embankment                | low    |
| <b>15. Kolubara</b>          | N 44.653359<br>E 20.217616 | 70  | Non-wadeable river | +  | Large, fine, cohesive | Embankment                | low    |
| <b>16. Barajevska reka</b>   | N 44.554289<br>E 20.394910 | 114 | Wadeable river     | +  | Cohesive, Organic     | Embankment, Concrete wall | High   |

|                             |                            |     |                |   |                     |            |        |
|-----------------------------|----------------------------|-----|----------------|---|---------------------|------------|--------|
| <b>17. Barička reka</b>     | N 44.648301<br>E 20.261449 | 83  | Wadeable river | + | Concrete            | Concrete   | low    |
| <b>18. Beljanica</b>        | N 44.494263<br>E 20.293189 | 88  | Wadeable river | + | Large, coarse       | Embankment | medium |
| <b>19. Peštan</b>           | N 44.416296<br>E 20.275762 | 89  | Wadeable river | + | Large, coarse, fine | Embankment | low    |
| <b>20. Ralja</b>            | N 44.585859<br>E 20.819978 | 109 | Wadeable river | + | Large, coarse       | Embankment | low    |
| <b>21. Topčiderska reka</b> | N 44.781192<br>E 20.437845 | 77  | Wadeable river | + | Large, coarse       | Embankment | low    |
| <b>22. Turija</b>           | N 44.483158<br>E 20.289680 | 89  | Wadeable river | - | Cohesive, Organic   | Embankment | high   |

Alt – Altitude (m a.s.l.), WBT – water body type, FV – Flow velocity, Bm – Bank modification, Av – Aquatic vegetation; Bottom supstrate: Large – boulders and cobbles, Coarse – pebble and gravel, Fine – sand, Cohesive – silt and clay, Organic – peat.

**Table S2.** Detected pressures at sampling sites and water quality classes according to the Water Pollution Index (WPI) value.

| Sites                        | Pressures |          |             |            | WPI   |       |
|------------------------------|-----------|----------|-------------|------------|-------|-------|
|                              | Communal  | Industry | Agriculture | Recreation | value | class |
| <b>1. Savsko jezero</b>      | low       | -        | -           | high       | 0.77  | II    |
| <b>2. Bela reka</b>          | low       | -        | -           | low        | 0.86  | II    |
| <b>3. Duboki potok</b>       | medium    | -        | medium      | -          | 0.79  | II    |
| <b>4. Pariguz</b>            | medium    | -        | medium      | medium     | 0.94  | II    |
| <b>5. Galovica</b>           | medium    | -        | high        | -          | 1.62  | III   |
| <b>6. Kalovita</b>           | high      | medium   | low         | -          | 2.25  | IV    |
| <b>7. Karaš</b>              | low       | -        | high        | -          | 0.75  | II    |
| <b>8. Obrenovački kanal</b>  | high      | -        | medium      | -          | 1.37  | III   |
| <b>9. PKB</b>                | -         | -        | high        | -          | 1.34  | III   |
| <b>10. Progarska Jarčina</b> | -         | -        | high        | -          | 0.91  | II    |
| <b>11. Vizelj</b>            | high      | -        | medium      | -          | 0.66  | II    |
| <b>12. Sibnica</b>           | high      | -        | high        | -          | 1.42  | III   |
| <b>13. Danube</b>            | high      | medium   | medium      | -          | 1.83  | III   |
| <b>14. Sava</b>              | high      | medium   | low         | low        | 0.84  | II    |
| <b>15. Kolubara</b>          | medium    | low      | high        | -          | 1.46  | III   |
| <b>16. Barajevska reka</b>   | medium    | -        | high        | -          | 6.20  | VI    |
| <b>17. Barička reka</b>      | high      | medium   | medium      | -          | 16.54 | VI    |
| <b>18. Beljanica</b>         | -         | medium   | high        | -          | 1.08  | III   |
| <b>19. Peštan</b>            | low       | medium   | medium      | -          | 1.83  | III   |
| <b>20. Ralja</b>             | low       | -        | medium      | -          | 2.05  | IV    |
| <b>21. Topčiderska reka</b>  | high      | high     | -           | -          | 5.46  | V     |
| <b>22. Turija</b>            | low       | high     | medium      | -          | 1.88  | III   |

**Table S3.** Taxa list and frequencies of species in four clusters of species assemblages.

| Taxa list                                                | Cluster |      |      |      |
|----------------------------------------------------------|---------|------|------|------|
|                                                          | A       | B    | C    | D    |
| <i>Psectrocladius</i> sp.                                | 0.50    | .    | .    | .    |
| <i>Nanocladius rectinervis</i> (Kieffer, 1911)           | 0.50    | .    | 0.20 | .    |
| <i>Conchapelopia</i> agg.                                | 1.00    | 0.50 | 0.20 | 0.14 |
| <i>Rheocricotopus</i> sp.                                | 0.75    | .    | .    | 0.14 |
| <i>Rheocricotopus fuscipes</i> (Kieffer, 1909)           | 0.50    | 0.17 | .    | .    |
| <i>Eukiefferiella claripennis</i> (Lundbeck, 1898)       | 0.25    | .    | .    | .    |
| <i>Heterotrissocladius</i> sp.                           | 0.25    | .    | .    | .    |
| <i>Polypedilum tritum</i> (Walker, 1856)                 | 0.25    | .    | .    | .    |
| <i>Polypedilum convictum</i> (Walker, 1856)              | 0.50    | .    | .    | .    |
| <i>Procladius</i> sp.                                    | 1.00    | 0.83 | 0.40 | 0.14 |
| <i>Thienemanniella</i> sp.                               | 0.75    | 0.17 | .    | 0.14 |
| <i>Apsectrotanypus trifascipennis</i> Zetterstedt, 1838  | 0.25    | .    | .    | .    |
| <i>Tvetenia calvescens</i> agg.                          | 0.25    | .    | .    | .    |
| <i>Parametriocnemus stylatus</i> (Spaerck, 1923)         | 0.25    | .    | .    | .    |
| <i>Tanypus kraatzi</i> (Kieffer, 1912)                   | 0.25    | .    | .    | .    |
| <i>Cryptotendipes</i> sp.                                | .       | 0.33 | .    | .    |
| <i>Microchironomus tener</i> (Kieffer, 1918)             | .       | 0.67 | .    | 0.14 |
| <i>Polypedilum</i> gr. <i>scalaenum</i>                  | 0.75    | 0.83 | 0.60 | .    |
| <i>Harnischia fuscimana</i> complex                      | .       | 0.33 | .    | .    |
| <i>Dicrotendipes pulsus</i> (Walker, 1856)               | .       | .    | 0.40 | 0.14 |
| <i>Glyptotendipes paripes</i> (Edwards, 1929)            | .       | .    | 0.40 | .    |
| <i>Polypedilum nubeculosum</i> (Meigen, 1804)            | .       | .    | 0.20 | .    |
| <i>Kiefferulus tendipediformis</i> (Goetghebuer, 1921)   | .       | .    | 0.20 | .    |
| <i>Polypedilum albicorne</i> (Meigen, 1838)              | .       | 0.17 | 0.40 | .    |
| <i>Glyptotendipes pallens</i> agg.                       | .       | .    | 0.20 | 0.43 |
| <i>Xenopelopia</i> sp.                                   | .       | .    | .    | 0.29 |
| <i>Monopelopia tenuicalcar</i> (Kieffer, 1918)           | 0.25    | 0.33 | 0.20 | 0.86 |
| <i>Paracladopelma</i> sp.                                | .       | .    | .    | 0.29 |
| <i>Endochironomus albipennis</i> (Meigen, 1830)          | .       | 0.17 | .    | 0.43 |
| <i>Paratendipes</i> gr. <i>albimanus</i>                 | 0.25    | 0.33 | 0.20 | .    |
| <i>Polypedilum cultellatum</i> Goetghebuer, 1931         | .       | 0.17 | .    | .    |
| <i>Rheotanytarsus</i> spp.                               | 0.50    | 0.50 | .    | .    |
| <i>Rheocricotopus chalybeatus</i> (Edwards, 1929)        | 0.25    | 0.17 | .    | .    |
| <i>Synorthocladius semivirens</i> (Kieffer, 1909)        | .       | 0.17 | .    | .    |
| <i>Virgatanytarsus</i> sp.                               | .       | .    | .    | 0.14 |
| <i>Tanytarsus</i> sp.                                    | 0.50    | 0.67 | 0.40 | 0.29 |
| <i>Psectrotanypus</i> sp.                                | .       | 0.17 | .    | 0.14 |
| <i>Polypedilum pedestre</i> (Meigen, 1830)               | 0.25    | .    | .    | 0.14 |
| <i>Polypedilum nubifer</i> Skuse, 1889                   | .       | 0.50 | 0.40 | 0.43 |
| <i>Polypedilum sordens</i> (van der Wulp 1874)           | .       | .    | .    | 0.14 |
| <i>Psectrocladius</i> gr. <i>sordidellus/limbatellus</i> | .       | 0.17 | .    | .    |
| <i>Prodiamesa olivacea</i> (Meigen, 1818)                | 0.25    | 0.17 | .    | .    |

|                                                            |      |      |      |      |
|------------------------------------------------------------|------|------|------|------|
| <i>Parachironomus gracilior</i> (Kieffer, 1918)            | .    | 0.17 | 0.60 | 0.29 |
| <i>Cladotanytarsus</i> sp.                                 | .    | 0.33 | 0.20 | .    |
| <i>Cladopelma</i> gr. <i>viridula</i>                      | .    | 0.17 | .    | 0.14 |
| <i>Cladopelma</i> gr. <i>goetghebueri</i>                  | .    | .    | 0.20 | 0.14 |
| <i>Cricotopus bicinctus</i> (Meigen, 1818)                 | 0.50 | 0.50 | .    | 0.29 |
| <i>Corynoneura coronata</i> Edwards, 1924                  | 0.25 | .    | .    | 0.14 |
| <i>Brillia longifurca</i> Kieffer 1921                     | .    | 0.17 | .    | .    |
| <i>Anatopynia plumipes</i> (Fries, 1823)                   | .    | 0.17 | 0.20 | .    |
| <i>Ablabesmyia</i> gr. <i>monilis</i>                      | .    | 0.17 | 0.20 | 0.29 |
| <i>Chironomus plumosus</i> agg.                            | 0.25 | 0.50 | 0.20 | 0.57 |
| <i>Chironomus riparius</i> Meigen, 1804                    | 0.50 | 0.33 | .    | .    |
| <i>Chironomus acutiventris</i> Wülker & Ryser, 1983        | .    | 0.17 | .    | .    |
| <i>Cricotopus</i> gr. <i>sylvestris</i>                    | 1.00 | 1.00 | 0.60 | 0.71 |
| <i>Nanocladius</i> gr. <i>dichromus</i>                    | 0.25 | 0.33 | 0.20 | .    |
| <i>Microtendipes chloris/pedellus</i> gr.                  | 0.50 | .    | 0.20 | 0.14 |
| <i>Micropsectra</i> sp.                                    | 0.50 | 0.33 | 0.20 | .    |
| <i>Paratanytarsus dissimilis</i> agg.                      | .    | 0.33 | 0.80 | 0.71 |
| <i>Orthocladius</i> sp.                                    | 0.50 | 0.17 | 0.20 | 0.29 |
| <i>Demicryptochironomus vulneratus</i> (Zetterstedt, 1838) | 0.25 | .    | .    | 0.14 |
| <i>Cryptochironomus</i> sp.                                | .    | 0.33 | 0.40 | .    |
| <i>Cricotopus tremulus</i> (Linnaeus, 1758)                | .    | 0.17 | .    | .    |
| <i>Endochironomus tendens</i> Chernovskij, 1949            | .    | 0.17 | 0.20 | .    |
| <i>Dicrotendipes nervosus</i> (Staeger, 1839)              | 0.75 | 0.50 | 0.40 | 0.43 |
| <i>Dicrotendipes lobiger</i> (Kieffer, 1916)               | .    | .    | .    | 0.14 |
